# Supplementary material
Source: PubMed Central journal article supplement (PMC8259651)

# **Safety and efficacy of vitamin K antagonists versus rivaroxaban in hemodialysis patients with atrial fibrillation: a multicenter randomized controlled trial**

## **Supplementary Appendix**

### **Table of Contents**

#### Supplemental Methods

Definition of secondary endpoints

Calculation of risk scores

#### Supplemental Tables

Supplemental Table 1: Baseline characteristics by anticoagulant discontinuation

Supplemental Table 2: Causes of death

Supplemental Table 3: Secondary efficacy outcomes for the VKA arm versus the pooled rivaroxaban arms

Supplemental Table 4: Bleeding outcomes for the VKA arm versus the pooled rivaroxaban arms

#### Supplemental Figure

Supplemental Figure 1: Kaplan-Meier curve for the primary endpoint in the VKA arm versus the pooled rivaroxaban arms

## Supplemental methods

### Definition of secondary endpoints

Sudden death was defined as sudden and unexpected death within an hour of symptom onset. If unwitnessed, the patient was seen alive and clinically stable less than 24 hours prior to being found dead without any evidence supporting a specific cause of death.

Stroke was defined as the sudden onset of a focal neurological deficit lasting at least 24 hours, consistent with the territory of a major cerebral artery, and categorized as ischemic, hemorrhagic, or of uncertain type. Hemorrhagic transformation of ischemic stroke was not deemed to be hemorrhagic stroke. An event matching this definition but lasting less than 24 hours was considered to be a transient ischemic attack. Systemic embolism was defined as an acute vascular occlusion of a limb or organ documented by imaging, surgery, or autopsy.

Acute coronary syndrome was defined by typical symptoms and cardiac biomarker elevation above the upper limit of normal or new pathological Q waves in at least 2 contiguous electrocardiogram leads.

Symptom-driven revascularization was defined as an acute coronary syndrome or symptoms suggestive of coronary insufficiency leading to invasive coronary artery assessment and a subsequent revascularization procedure (percutaneous coronary intervention or coronary artery bypass grafting).

Hospitalization for heart failure was defined as an unscheduled hospital admission for heart failure, characterized by typical signs and symptoms and diagnostic testing consistent with a diagnosis of heart failure, including elevated natriuretic peptides, radiological evidence of congestion or echocardiographic evidence of elevated filling pressures.

Symptomatic aortic valve stenosis was defined as aortic valve stenosis resulting in symptoms such as angina, syncope or heart failure, and leading to the consideration of surgical aortic valve replacement or transcatheter aortic valve implantation.

Death from cardiac cause was defined as death resulting from acute coronary syndrome, sudden cardiac death, death due to heart failure or death due to an identified arrhythmia (captured on an electrocardiogram, witnessed on a monitor, or recorded on an implantable cardioverter-defibrillator).

Symptomatic lower limb ischemia was defined as clinical evidence of limb ischemia due to atherosclerotic vascular disease requiring revascularization or amputation. In patients undergoing multiple consecutive revascularization or amputation procedures, only the first episode was considered.

Calciphylaxis was defined as (an) active skin lesion(s) with a morphological appearance consistent with calciphylaxis (including but not limited to livedo, induration, ulceration, necrosis) or

histological features consistent with calciphylaxis (including but not limited to soft tissue calcification, arteriolar thrombosis, medial calcific necrosis of terminal arterioles).

Bowel ischemia was defined as clinical (abdominal pain), biochemical (lactic acidosis) or imaging evidence of interruption of the blood supply to a segment of the intestine.

### **Calculation of risk scores**

The CHA<sub>2</sub>DS<sub>2</sub>-VASc score was calculated by assigning 1 point each for age between 65 and 74 years, history of hypertension, diabetes, congestive heart failure, vascular disease (defined as prior myocardial infarction, aortic plaque or peripheral artery disease) and female gender, and 2 points each for a history of stroke/TIA and age  $\geq 75$  years.

The HAS-BLED score was calculated by assigning automatically 1 point for abnormal renal function and 1 point each for uncontrolled hypertension (systolic blood pressure  $>160$  mmHg), abnormal liver function, history of stroke/TIA, history of bleeding, age  $\geq 65$  years, concomitant use of drugs that enhance bleeding risk and excessive use of alcohol. Labile INR was not included in the HAS-BLED score as this would hamper comparison of patients on VKA and not on VKA.

## Supplemental Tables

**Supplemental Table 1: Baseline characteristics by anticoagulant discontinuation**

| Baseline characteristics                                  | Anticoagulant discontinuation (n=33) | No anticoagulant discontinuation (n=99) | P <sup>3</sup> |
|-----------------------------------------------------------|--------------------------------------|-----------------------------------------|----------------|
| Age – yr.                                                 | 77.2 (68.6-82.9)                     | 80.6 (76.1-84.1)                        | P=0.033        |
| Male – % (no.)                                            | 69.7% (23/33)                        | 65.7% (65/99)                           | P=0.832        |
| History of stroke – % (no.)                               | 27.3% (9/33)                         | 31.3% (31/99)                           | P=0.827        |
| History of gastrointestinal bleeding – % (no.)            | 36.4% (12/33)                        | 25.3% (25/99)                           | P=0.264        |
| Diabetes – % (no.)                                        | 48.5% (16/33)                        | 46.5% (46/99)                           | P=0.844        |
| History of AMI – % (no.)                                  | 45.5% (15/33)                        | 46.5% (46/99)                           | P=0.999        |
| Congestive heart failure – % (no.)                        | 27.3% (9/33)                         | 32.3% (32/99)                           | P=0.668        |
| Preexisting vascular disease – % (no.)                    | 42.4% (14/33)                        | 56.6% (56/99)                           | P=0.166        |
| Dialysis vintage – yr.                                    | 2.4 (0.8-5.9)                        | 2.6 (0.6-5.7)                           | P=0.838        |
| Incident dialysis (<3 mo.) – % (no.)                      | 12.1% (4/33)                         | 18.2% (18/99)                           | P=0.591        |
| CHAD <sub>2</sub> D <sub>2</sub> -VASc score <sup>1</sup> |                                      |                                         |                |
| Mean ± SD                                                 | 4.3 (1.3)                            | 4.8 (1.4)                               |                |
| Median score ± IQR                                        | 4.0 (3.5-5.0)                        | 5.0 (4.0-6.0)                           | P=0.061        |
| Number ≥2 (men) or ≥3 (women)                             | 100% (33/33)                         | 100% (99/99)                            | --             |
| HAS-BLED score <sup>2</sup>                               |                                      |                                         |                |
| Mean ± SD                                                 | 4.8 (1.0)                            | 4.6 (0.9)                               |                |
| Median score ± IQR                                        | 5.0 (4.0-5.5)                        | 5.0 (4.0-5.0)                           | P=0.257        |
| VKA vintage – yr.                                         | 0.9 (0.0-4.4)                        | 1.2 (0.0-4.6)                           | P=0.693        |
| VKA naïve (<3 mo.) – % (no.)                              | 42.4% (14/33)                        | 33.3% (33/99)                           | P=0.524        |
| Aspirin – % (no.)                                         | 42.4% (14/33)                        | 32.3% (32/99)                           | P=0.300        |

Numbers displayed are median (interquartile range) unless otherwise specified; <sup>1</sup>the CHAD<sub>2</sub>D<sub>2</sub>-VASc score ranges from 2 (minimum score to be included) to 9, with higher scores indicating an increased risk; <sup>2</sup>the HAS-BLED score ranges from 1 (as patients by definition have renal failure) to 8 (as we did not include labile INR), with higher scores indicating an increased risk; <sup>3</sup>according to the Fisher's exact test or the Kruskal-Wallis test.

## Supplemental Table 2: Causes of death

|                                 | VKA<br>(n=44) | Rivaroxaban<br>(n=46) | Rivaroxaban+vit K2<br>(n=42) | P*      |
|---------------------------------|---------------|-----------------------|------------------------------|---------|
| Death from any cause            |               |                       |                              |         |
| – no. (%)                       | 32 (72.7%)    | 30 (65.2%)            | 27 (64.3%)                   | P=0.656 |
| – per 100 person-years          | 33.7          | 28.3                  | 30.2                         |         |
| Sudden death – no.              | 5             | 7                     | 4                            |         |
| Cardiovascular disease          |               |                       |                              |         |
| Ischemic stroke – no.           | 1             | 0                     | 1                            |         |
| Acute coronary syndrome – no.   | 2             | 3                     | 1                            |         |
| Terminal heart failure – no.    | 3             | 1                     | 1                            |         |
| Ischemic colitis                | 0             | 2                     | 2                            |         |
| Limb ischemia – no.             | 1             | 0                     | 1                            |         |
| Bleeding                        |               |                       |                              |         |
| Intracerebral bleeding – no.    | 1             | 0                     | 0                            |         |
| Gastrointestinal bleeding – no. | 2             | 0                     | 0                            |         |
| Infectious disease              |               |                       |                              |         |
| Endocarditis – no.              | 1             | 0                     | 1                            |         |
| Sepsis – no.                    | 3             | 6                     | 2                            |         |
| Respiratory infection – no.     | 1             | 3                     | 2                            |         |
| Malignancy – no.                | 1             | 2                     | 4                            |         |
| Multiorgan failure – no.        | 1             | 0                     | 0                            |         |
| Lactic acidosis – no.           | 1             | 0                     | 0                            |         |
| Accident – no.                  | 0             | 0                     | 2                            |         |
| Withdrawal of dialysis – no.    | 9             | 6                     | 6                            |         |

VKA, vitamin K antagonist; \*according to Fisher's exact test.

**Supplemental Table 3: Secondary efficacy outcomes for the VKA arm versus the pooled rivaroxaban arms**

| Outcome Parameter                          | VKA<br>(n=44) | Pooled Rivaroxaban<br>(n=88) | P**      |
|--------------------------------------------|---------------|------------------------------|----------|
| Death from any cause – no. (%)             | 32 (72.7%)    | 57 (64.8%)                   | P=0.432  |
| Sudden death – no.                         | 5             | 11                           | P=0.850  |
| Stroke or systemic embolism                |               |                              |          |
| Ischemic or uncertain type of stroke – no. | 7             | 6                            | P=0.124  |
| Hemorrhagic stroke – no.                   | 2             | 0                            | P=0.109  |
| Systemic embolism – no.                    | 0             | 0                            | --       |
| Cardiac disease                            |               |                              |          |
| Acute coronary syndrome – no.              | 6             | 11                           | P=0.854  |
| Symptom-driven revascularization* – no.    | 2             | 7                            | P=0.717  |
| Hospitalization for heart failure – no.    | 5             | 4                            | P=0.159  |
| Symptomatic aortic valve stenosis – no.    | 2             | 0                            | P=0.109  |
| Death from cardiac cause – no.             | 5             | 6                            | P=0.505  |
| Other vascular disease                     |               |                              |          |
| Symptomatic lower limb ischemia– no.       | 20            | 19                           | P=0.0080 |
| Calciphylaxis – no.                        | 4             | 2                            | P=0.095  |
| Bowel ischemia – no.                       | 1             | 4                            | P=0.664  |

\*Including acute coronary syndrome; \*\*according to Fisher’s exact test; VKA, vitamin K antagonist

**Supplemental Table 4: Bleeding outcomes for the VKA arm versus the pooled rivaroxaban arms**

| Outcome Parameter                  | VKA<br>(n=44) | Pooled Rivaroxaban<br>(n=88) | P <sub>Cox</sub> | P <sub>Cox-adj</sub> |
|------------------------------------|---------------|------------------------------|------------------|----------------------|
| Total bleeding                     | 24 (49)       | 43 (72)                      | P=0.793          | P=0.561              |
| Life-threatening bleeding          | 11 (12)       | 9 (11)                       | P=0.036          | P=0.033              |
| Major bleeding                     | 10 (18)       | 10 (12)                      | P=0.085          | P=0.081              |
| Life-threatening or major bleeding | 17 (30)       | 17 (23)                      | P=0.017          | P=0.015              |
| Minor bleeding                     | 13 (19)       | 32 (49)                      | P=0.379          | P=0.407              |
| Gastrointestinal bleeding          | 12 (23)       | 22 (35)                      | P=0.738          | P=0.744              |

Cell entries are number of patients with at least one bleeding episode (total number of bleeding episodes); P<sub>Cox</sub>, significance of differences in time to first bleeding episode according to Cox proportional hazard model analysis; P<sub>Cox-adj</sub>, P<sub>Cox</sub> adjusted for competing risk of death; VKA, vitamin K antagonist

## Supplemental Figure

### Supplemental Figure 1: Kaplan-Meier curve for the primary endpoint in the VKA arm versus the pooled rivaroxaban arms

Survival free of fatal and non-fatal cardiovascular events in the VKA (blue line) and pooled rivaroxaban (red line) groups. The primary endpoint occurred in 35 patients in the VKA group (63.8 per 100 person-years) and in 40 patients in the pooled rivaroxaban groups (23.8 per 100 person-years). The estimated competing risk adjusted hazard ratio (95% CI, P-value) was 0.37 (0.24-0.58,  $P < 0.0001$ ) in the pooled rivaroxaban groups in comparison to the VKA group.

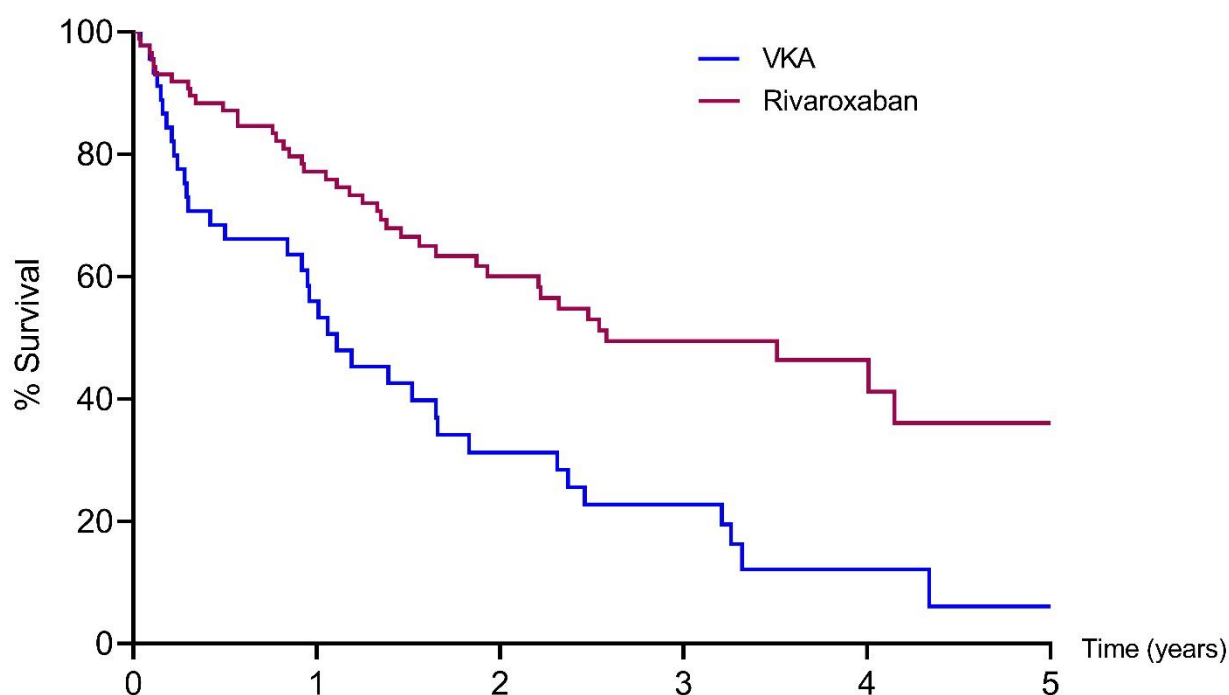

Supplement: ASN.2020111566SupplementaryData.pdf [file ASN.2020111566SupplementaryData.pdf]
